# Supplementary material for: Selection of a recyclablein situliquid–liquid extraction solvent for foam-free synthesis of rhamnolipids in a two-phase fermentation
Source: Royal Society of Chemistry journal article supplement (doi:10.1039/d0gc02885a), 2020-01-01
Supplement: d0gc02885a2.xlsx [file d0gc02885a2.xlsx]

## Sheet: solvents
Electronic Supplementary Information for "Selection of a recyclable in situ liquid-liquid extraction solvent for foam-free synthesis of rhamnolipids in a two-phase fermentation", Demling et al. 2020
n.a. - not available or only for analytical application available
Solvent name (IUPAC)	CAS	Suitable Solvent?		Solvent properties (20°C, 1.13 bar)														Price (list price)
				Density			Solubility			Boiling point			log KOW-value		Flashpoint
			Suitable?	[g/L]	source	Suitable?	[g/L]	source	Suitable?	[°C]	source	Suitable?	[-]	source	[°C]	source	Suitable?	[€/100ml]	source	date	Suitable?	H304	H371	H373	H302	H312	H332	H336	EUH070	H315	H317	H319	H335	EUH066	H334	H318	H341	H351	H361	H370	H372	H301	H311	H331	H314	H340	H350	H360	H300
				≤			≤			≥			≥					≤		[DD.MM.YYYY]
				880			0.3			100			4					100
				920			0.5			80			3.5					120
Spalte2	Spalte3	Spalte4	Spalte42	Spalte5	Spalte6	Spalte62	Spalte7	Spalte8	Spalte82	Spalte9	Spalte12	Spalte122	Spalte13	Spalte14	Spalte143	Spalte142	Spalte1422	Spalte15	Spalte16	Spalte17	Spalte172	Spalte186	Spalte187	Spalte188	Spalte1887	Spalte1888	Spalte1889	Spalte1890	Spalte1891	Spalte1892	Spalte1893	Spalte1894	Spalte1895	Spalte1896	Spalte1882	Spalte1883	Spalte1884	Spalte1885	Spalte1886	Spalte189	Spalte184	Spalte185	Spalte183	Spalte1832	Spalte18322	Spalte18323	Spalte18324	Spalte1833	Spalte18332
ethyl decanoate	110-38-3	unrestricted	0	862	www.chemspider.com	0	0.0159	www.pubchem.com	0	241.5	www.pubchem.com	0	4.79	www.chemspider.com	104	Merck KGaA, Darmstadt, Germany	0	23	www.sigmaaldrich.com	2020-05-24	0
ethyl (Z)-octadec-9-enoate	111-62-6	unrestricted	0	870	www.chemspider.com	0	5.79e-07	www.chemspider.com	0	217	www.chemspider.com	0	8.51	www.chemspider.com	>103	Deutsche Gesetzliche Unfallversicherung e.V., Berlin, Germany	0	47.67	www.sigmaaldrich.com	2020-05-24	0
methyl decanoate	110-42-9	unrestricted	0	873	www.pubchem.com	0	0.0044	www.pubchem.com	0	224	www.pubchem.com	0	4.41	www.pubchem.com	107	Carl Roth GmbH + Co. KG, Karlsruhe, Germany	0	55.9593	www.sigmaaldrich.com	2020-05-24	0
dioctyl ether	629-82-3	unrestricted	0	820	www.pubchem.com	0	0.1	www.sigmaaldrich.com	0	300	www.pubchem.com	0	5.7	pubchem.ncbi.nlm.nih.gov	109	Deutsche Gesetzliche Unfallversicherung e.V., Berlin, Germany	0	83.64	www.sigmaaldrich.com	2020-05-24	0
1-methyl-4-prop-1-en-2-ylcyclohexene	138-86-3	unrestricted	0	841	www.pubchem.com	0	0.0138	www.pubchem.com	0	176	www.pubchem.com	0	4.57	www.pubchem.com	43	Merck KGaA, Darmstadt, Germany	0	5.12	www.sigmaaldrich.com	2020-05-24	0									1	1
dec-1-ene	872-05-9	unrestricted	0	741	www.pubchem.com	0	0.000115	www.pubchem.com	0	170.6	www.pubchem.com	0	5.7	www.pubchem.com	44	Deutsche Gesetzliche Unfallversicherung e.V., Berlin, Germany	0	20.6	www.sigmaaldrich.com	2020-05-24	0	1
decan-1-ol	112-30-1	unrestricted	0	829.7	www.pubchem.com	0	0.037	www.pubchem.com	0	230	www.pubchem.com	0	4.57	www.pubchem.com	108	Deutsche Gesetzliche Unfallversicherung e.V., Berlin, Germany	0	21.4	www.sigmaaldrich.com	2020-05-24	0											1
dodec-1-ene	112-41-4	unrestricted	0	758	www.pubchem.com	0	0	www.pubchem.com	0	212.8	www.pubchem.com	0	6.1	www.pubchem.com	77	Merck KGaA, Darmstadt, Germany	0	24.1	www.sigmaaldrich.com	2020-05-24	0	1
dodecane	112-40-3	unrestricted	0	750	www.pubchem.com	0	3.7e-06	www.pubchem.com	0	216.3	www.pubchem.com	0	6.1	www.pubchem.com	70	Carl Roth GmbH + Co. KG, Karlsruhe, Germany	0	26.7	www.sigmaaldrich.com	2020-05-24	0	1
oct-1-ene	111-66-0	unrestricted	0	715	www.pubchem.com	0	0.0041	www.pubchem.com	0	121.2	www.pubchem.com	0	4.57	www.pubchem.com	8	Merck KGaA, Darmstadt, Germany	0	29.1	www.sigmaaldrich.com	2020-05-24	0	1
octane	111-65-9	unrestricted	0	699	www.pubchem.com	0	0.00066	www.pubchem.com	0	126	www.pubchem.com	0	5.18	www.pubchem.com	13	Carl Roth GmbH + Co. KG, Karlsruhe, Germany	0	35.2	www.sigmaaldrich.com	2020-05-24	0	1						1		1
decane	124-18-5	unrestricted	0	730	www.pubchem.com	0	5.2e-05	www.pubchem.com	0	174.1	www.pubchem.com	0	5.01	www.pubchem.com	51	Merck KGaA, Darmstadt, Germany	0	37.2	www.sigmaaldrich.com	2020-05-24	0	1
undecan-2-one	112-12-9	unrestricted	0	826	www.pubchem.com	0	0.02	www.pubchem.com	0	231.5	www.pubchem.com	0	4.09	www.pubchem.com	96	Merck KGaA, Darmstadt, Germany	0	38	www.sigmaaldrich.com	2020-05-24	0									1
nonane	111-84-2	unrestricted	0	718	www.pubchem.com	0	0.00022	www.pubchem.com	0	150.5	www.pubchem.com	0	5.65	www.pubchem.com	31	Merck KGaA, Darmstadt, Germany	0	43.4	www.sigmaaldrich.com	2020-05-24	0	1						1		1
hexadecane	544-76-3	unrestricted	0	770	www.pubchem.com	0	9e-07	www.pubchem.com	0	287.2	www.pubchem.com	0	8.2	www.pubchem.com	135	Merck KGaA, Darmstadt, Germany	0	54.5	www.sigmaaldrich.com	2020-05-24	0	1
undecane	1120-21-4	unrestricted	0	740	www.pubchem.com	0	4.4e-06	www.pubchem.com	0	195.5	www.pubchem.com	0	5.74	www.pubchem.com	56	Carl Roth GmbH + Co. KG, Karlsruhe, Germany	0	55.9	www.sigmaaldrich.com	2020-05-24	0	1
cyclooctane	292-64-8	unrestricted	0	834	www.sigmaaldrich.com	0	0.004918	www.chemspider.com	0	149	www.chemspider.com	0	4.45	www.chemspider.com	28	Merck KGaA, Darmstadt, Germany	0	57	www.sigmaaldrich.com	2020-05-24	0	1
butylbenzene	104-51-8	unrestricted	0	860	www.pubchem.com	0	0.0118	www.pubchem.com	0	183.3	www.pubchem.com	0	4.38	www.pubchem.com	58	Merck KGaA, Darmstadt, Germany	0	76	www.sigmaaldrich.com	2020-05-24	0											1
methyl nonanoate	1731-84-6	restricted	1	900	www.chemspider.com	0	0.0229	www.pubchem.com	0	213.5	www.pubchem.com	0	4.32	www.pubchem.com	87	Deutsche Gesetzliche Unfallversicherung e.V., Berlin, Germany	0	4.95	www.sigmaaldrich.com	2020-05-24	0
octyl acetate	112-14-1	restricted	0	868	www.chemspider.com	0	0.046	www.chemspider.com	0	210	www.pubchem.com	1	3.81	www.chemspider.com	83	Deutsche Gesetzliche Unfallversicherung e.V., Berlin, Germany	0	31.248	www.sigmaaldrich.com	2020-05-24	0
(Z)-octadec-9-enoic acid	112-80-1	restricted	1	895	www.pubchem.com	0	1.15e-05	www.pubchem.com	0	286	www.pubchem.com	0	7.64	www.pubchem.com	189	Deutsche Gesetzliche Unfallversicherung e.V., Berlin, Germany	0	4.56	www.sigmaaldrich.com	2020-05-24	0									1		1
1,2,4-trimethylbenzene	95-63-6	restricted	0	876	www.pubchem.com	0	0.057	www.pubchem.com	0	168.9	www.pubchem.com	1	3.78	www.pubchem.com	50	Deutsche Gesetzliche Unfallversicherung e.V., Berlin, Germany	0	19.9	www.sigmaaldrich.com	2020-05-24	0						1			1		1	1
2-phenylpropane	98-82-8	restricted	0	862	www.pubchem.com	0	0.0613	www.pubchem.com	0	152.4	www.pubchem.com	1	3.66	www.pubchem.com	31	Deutsche Gesetzliche Unfallversicherung e.V., Berlin, Germany	0	20.9	www.sigmaaldrich.com	2020-05-24	0	1											1
nonan-1-ol	143-08-8	restricted	0	827	www.pubchem.com	0	0.14	www.pubchem.com	0	213.3	www.pubchem.com	1	3.77	www.pubchem.com	98.5	Deutsche Gesetzliche Unfallversicherung e.V., Berlin, Germany	0	23.4	www.sigmaaldrich.com	2020-05-24	0											1
propylbenzene	103-65-1	restricted	0	862	www.pubchem.com	0	0.0234	www.pubchem.com	0	159	www.pubchem.com	1	3.69	www.pubchem.com	39	Deutsche Gesetzliche Unfallversicherung e.V., Berlin, Germany	0	26.6	www.sigmaaldrich.com	2020-05-24	0	1											1
1-chloroheptane	629-06-1	restricted	1	900	www.chemspider.com	0	0.02517	www.chemspider.com	0	159	www.pubchem.com	0	4.15	www.pubchem.com	38	www.chemspider.com	0	56.1	www.sigmaaldrich.com	2020-05-24	0									1		1	1
2,2,4-trimethylpentane	540-84-1	restricted	0	692	www.pubchem.com	0	0.00991	www.chemspider.com	1	99.2	www.pubchem.com	0	4.46	www.chemspider.com	-9	Deutsche Gesetzliche Unfallversicherung e.V., Berlin, Germany	0	60.2	www.sigmaaldrich.com	2020-05-24	0	1						1		1
heptane	142-82-5	restricted	0	680	www.pubchem.com	0	0.0034	www.pubchem.com	1	98.4	www.pubchem.com	0	4.66	www.pubchem.com	-7	Deutsche Gesetzliche Unfallversicherung e.V., Berlin, Germany	0	63	www.sigmaaldrich.com	2020-05-24	0	1						1		1
(1Z,5Z)-cycloocta-1,5-diene	111-78-4	restricted	1	882	www.pubchem.com	0	0	www.pubchem.com	0	150.8	www.pubchem.com	1	3.67	www.chemspider.com	31	Deutsche Gesetzliche Unfallversicherung e.V., Berlin, Germany	0	70.5	www.sigmaaldrich.com	2020-05-24	0	1			1		1
methylcyclohexane	108-87-2	restricted	0	770	www.pubchem.com	0	0.014	www.pubchem.com	0	100.9	www.pubchem.com	1	3.61	www.pubchem.com	-4	Deutsche Gesetzliche Unfallversicherung e.V., Berlin, Germany	0	79.6	www.sigmaaldrich.com	2020-05-24	0	1						1		1
2-ethylhexyl 2-methylprop-2-enoate	688-84-6	restricted	0	880	www.pubchem.com	0	0.005922	www.chemspider.com	0	110	www.pubchem.com	0	4.54	www.pubchem.com	92	Merck KGaA, Darmstadt, Germany	1	106.8	www.sigmaaldrich.com	2020-05-24	0									1		1	1
bis(7-methyloctyl) benzene-1,2-dicarboxylate	68515-48-0	not suitable	2	990	www.chemspider.com	0	2.32e-08	www.chemspider.com	0	405	www.chemspider.com	0	9.77	www.chemspider.com	216.3	www.chemspider.com	0	4.14	www.sigmaaldrich.com	2020-05-24	0
bis(2-ethylhexyl) benzene-1,4-dicarboxylate	6422-86-2	not suitable	2	980	www.chemspider.com	0	2.39e-07	www.chemspider.com	0	400	www.sigmaaldrich.com	0	9.55	www.chemspider.com	212	Merck KGaA, Darmstadt, Germany	0	4.97	www.sigmaaldrich.com	2020-05-24	0
2-phenylethyl 3-methylbutanoate	140-26-1	not suitable	2	1000	www.chemspider.com	0	0.01052	www.chemspider.com	0	268	www.sigmaaldrich.com	1	3.84	www.chemspider.com	113	Merck KGaA, Darmstadt, Germany	0	8.3	www.sigmaaldrich.com	2020-05-24	0
benzylbenzene	101-81-5	not suitable	2	1010	www.chemspider.com	0	0.01826	www.chemspider.com	0	262	www.chemspider.com	0	4.21	www.chemspider.com	130	www.chemspider.com	0	10.92	www.sigmaaldrich.com	2020-05-24	0
Butyl benzoate	136-60-7	not suitable	2	1010	www.chemspider.com	0	0.02952	www.chemspider.com	0	249	www.sigmaaldrich.com	1	3.79	www.chemspider.com	106	Merck KGaA, Darmstadt, Germany	0	12	www.sigmaaldrich.com	2020-05-24	0
1-methylnaphthalene	90-12-0	not suitable	2	1020	www.pubchem.com	0	0.0258	www.pubchem.com	0	244	www.pubchem.com	1	3.87	www.pubchem.com	82	Merck KGaA, Darmstadt, Germany	0	17.04	www.sigmaaldrich.com	2020-05-24	0
diethyl benzene-1,2-dicarboxylate	84-66-2	not suitable	2	1120	www.chemspider.com	2	n.a.	www.chemspider.com	0	289	www.sigmaaldrich.com	2	2.7	www.chemspider.com	156	Merck KGaA, Darmstadt, Germany	0	17.7	www.sigmaaldrich.com	2020-05-24	0
Ethyl benzoate	93-89-0	not suitable	2	1050	www.chemspider.com	1	0.4215	www.chemspider.com	0	212	www.sigmaaldrich.com	2	2.73	www.chemspider.com	93	Merck KGaA, Darmstadt, Germany	0	18.9	www.sigmaaldrich.com	2020-05-24	0
bis(2-ethylhexyl) hexanedioate	103-23-1	not suitable	2	922	www.pubchem.com	0	0.00078	www.pubchem.com	0	417	www.pubchem.com	0	8.12	www.chemspider.com	196	www.pubchem.com	0	19.9	www.sigmaaldrich.com	2020-05-24	0
Propyl Benzoate	2315-68-6	not suitable	2	1000	www.chemspider.com	0	0.176	www.chemspider.com	0	231	www.sigmaaldrich.com	2	3.26	www.chemspider.com	100	Merck KGaA, Darmstadt, Germany	0	20.52	www.sigmaaldrich.com	2020-05-24	0
Hexyl acetate	142-92-7	not suitable	0	876	www.pubchem.com	2	0.511	www.pubchem.com	0	171.5	www.pubchem.com	2	2.83	www.chemspider.com	56	Merck KGaA, Darmstadt, Germany	0	20.6	www.sigmaaldrich.com	2020-05-24	0
ethyl (E)-3-phenylprop-2-enoate	103-36-6	not suitable	2	1050	www.chemspider.com	0	0.1606	www.chemspider.com	0	271	www.chemspider.com	2	2.71	www.chemspider.com	135	www.chemspider.com	0	21.95	www.sigmaaldrich.com	2020-05-24	0
dimethyl benzene-1,2-dicarboxylate	131-11-3	not suitable	2	1190	www.chemspider.com	1	0.4	www.chemspider.com	0	283	www.sigmaaldrich.com	2	1.64	www.chemspider.com	150	Merck KGaA, Darmstadt, Germany	0	22.4	www.sigmaaldrich.com	2020-05-24	0
2,6-di(propan-2-yl)aniline	24544-04-5	not suitable	2	940	www.chemspider.com	0	0.1092	www.chemspider.com	0	257	www.pubchem.com	1	3.61	www.chemspider.com	117	Merck KGaA, Darmstadt, Germany	0	28	www.sigmaaldrich.com	2020-05-24	0
1-bromooctane	111-83-1	not suitable	2	1120	www.chemspider.com	0	0.003161	www.chemspider.com	0	200	www.pubchem.com	0	4.89	www.pubchem.com	80	Merck KGaA, Darmstadt, Germany	0	32.03	www.sigmaaldrich.com	2020-05-24	0
Bromocyclohexane	108-85-0	not suitable	2	1340	www.chemspider.com	0	0.1226	www.chemspider.com	0	166	www.sigmaaldrich.com	2	3.21	www.chemspider.com	63	Merck KGaA, Darmstadt, Germany	0	57.218	www.sigmaaldrich.com	2020-05-24	0
3-methylbutyl acetate	123-92-2	not suitable	0	876	www.pubchem.com	2	2	www.pubchem.com	0	142.5	www.pubchem.com	2	2.25	pubchem.ncbi.nlm.nih.gov	25	Merck KGaA, Darmstadt, Germany	0	82.8	www.sigmaaldrich.com	2020-05-24	0
2-methoxy-1,3-dimethylbenzene	1004-66-6	not suitable	2	960	www.chemspider.com	0	0	www.chemspider.com	0	182.5	www.pubchem.com	2	3.02	www.pubchem.com	67	Merck KGaA, Darmstadt, Germany	2	132.48	www.sigmaaldrich.com	2020-05-24	0
decan-2-one	693-54-9	not suitable	0	820	www.chemspider.com	0	0.0768	www.pubchem.com	0	210	www.pubchem.com	1	3.73	www.pubchem.com	85	Deutsche Gesetzliche Unfallversicherung e.V., Berlin, Germany	2	158.42	www.sigmaaldrich.com	2020-05-24	0
pentylbenzene	538-68-1	not suitable	0	860	www.chemspider.com	0	0.005048	www.chemspider.com	0	204	www.chemspider.com	0	4.9	www.pubchem.com	66	Merck KGaA, Darmstadt, Germany	2	182.32	www.sigmaaldrich.com	2020-05-24	0
octylbenzene	2189-60-8	not suitable	0	850	www.chemspider.com	0	3.47e-07	www.pubchem.com	0	264.5	www.pubchem.com	0	6.3	www.pubchem.com	107	Merck KGaA, Darmstadt, Germany	2	197.2	www.sigmaaldrich.com	2020-05-24	0
1-hexoxyhexane	112-58-3	not suitable	0	793	www.chemspider.com	0	0.002874	www.chemspider.com	0	223	www.pubchem.com	0	5.252	pubchem.ncbi.nlm.nih.gov	78	Merck KGaA, Darmstadt, Germany	2	248.8	www.sigmaaldrich.com	2020-05-24	0
(9Z,12Z)-octadeca-9,12-dienoic acid	60-33-3	not suitable	1	902	www.pubchem.com	0	0.00159	www.pubchem.com	0	230	www.pubchem.com	0	7.05	www.pubchem.com	113	Deutsche Gesetzliche Unfallversicherung e.V., Berlin, Germany	2	276.914	www.sigmaaldrich.com	2020-05-24	0
2-ethylnaphthalene	939-27-5	not suitable	2	992	www.pubchem.com	0	0.01294	www.chemspider.com	0	257.8	www.pubchem.com	0	4.44	www.chemspider.com	104	Merck KGaA, Darmstadt, Germany	2	428.54	www.sigmaaldrich.com	2020-05-24	0
3-methylbutylbenzene	2049-94-7	not suitable	2	1000	www.chemspider.com	0	0.01368	www.chemspider.com	0	195	www.pubchem.com	0	4.14	www.chemspider.com	65	Merck KGaA, Darmstadt, Germany	2	600	www.sigmaaldrich.com	2020-05-24	0
1-(4-propan-2-ylphenyl)ethanone	645-13-6	not suitable	2	970	www.chemspider.com	0	0.1906	www.chemspider.com	0	277	www.chemspider.com	2	3	www.chemspider.com	110	www.chemspider.com	2	796	www.sigmaaldrich.com	2020-05-24	0
[(E)-prop-1-enyl]benzene	637-50-3	not suitable	1	910	www.chemspider.com	0	0.1404	www.chemspider.com	0	175	www.pubchem.com	2	3.22	www.chemspider.com	52	www.pubchem.com	2	n.a.		2020-05-24	0
Cyclopropylbenzene	873-49-4	not suitable	2	940	www.chemspider.com	0	0.1643	www.chemspider.com	0	173.6	www.pubchem.com	2	3.27	www.chemspider.com	44	Merck KGaA, Darmstadt, Germany	2	n.a.		2020-05-24	0
1,3-dimethylnaphthalene	575-41-7	not suitable	2	1000	www.chemspider.com	0	0.01196	www.chemspider.com	0	263	www.pubchem.com	0	4.37	www.chemspider.com	109	Merck KGaA, Darmstadt, Germany	2	n.a.		2020-05-24	0
1,2-dimethylnaphthalene	573-98-8	not suitable	2	1010	www.chemspider.com	0	0.01485	www.chemspider.com	0	266.5	www.pubchem.com	0	4.37	www.chemspider.com	113	Merck KGaA, Darmstadt, Germany	2	n.a.		2020-05-24	0
1,4-dimethylnaphthalene	571-58-4	not suitable	2	1000	www.chemspider.com	0	0.0132	www.chemspider.com	0	268	www.pubchem.com	0	4.37	www.chemspider.com	113	Merck KGaA, Darmstadt, Germany	2	n.a.		2020-05-24	0
1-ethylnaphthalene	1127-76-0	not suitable	2	1000	www.chemspider.com	0	0.01244	www.chemspider.com	0	258	www.sigmaaldrich.com	0	4.44	www.chemspider.com	111	Merck KGaA, Darmstadt, Germany	2	n.a.		2020-05-24	0
13-oxabicyclo[10.1.0]tridecane	286-99-7	not suitable	1	900	www.chemspider.com	0	0.00625	www.chemspider.com	0	261.7	www.chemspider.com	0	4.63	www.chemspider.com	82	www.chemspider.com	2	n.a.		2020-05-24	0
bis(8-methylnonyl) benzene-1,2-dicarboxylate	89-16-7	not suitable	2	970	www.chemspider.com	0	2.24e-09	www.chemspider.com	0	250	www.sigmaaldrich.com	0	10.83	www.chemspider.com	229	www.pubchem.com	2	n.a.		2020-05-24	0
propan-2-yl acetate	108-21-4	not suitable	0	870	www.chemspider.com	2	9.268	www.chemspider.com	1	85	www.sigmaaldrich.com	2	1.06	www.chemspider.com	4	Merck KGaA, Darmstadt, Germany	0	3.8	www.sigmaaldrich.com	2020-05-24	0							1				1
1,4-xylene	106-42-3	not suitable	0	870	www.chemspider.com	0	0.2286	www.chemspider.com	0	138	www.chemspider.com	2	3.14	www.chemspider.com	25	Merck KGaA, Darmstadt, Germany	0	4.37	www.sigmaaldrich.com	2020-05-24	0					1	1			1
4-Methyl-2-pentanone	108-10-1	not suitable	0	800	www.chemspider.com	2	8.888	www.chemspider.com	0	117	www.chemspider.com	2	1.25	www.chemspider.com	14	Merck KGaA, Darmstadt, Germany	0	6.98	www.sigmaaldrich.com	2020-05-24	0						1					1	1
Butyl acetate	123-86-4	not suitable	0	880	www.pubchem.com	2	8.3	www.pubchem.com	0	126.5	www.pubchem.com	2	1.78	pubchem.ncbi.nlm.nih.gov	23	Merck KGaA, Darmstadt, Germany	0	7.88	www.sigmaaldrich.com	2020-05-24	0							1
benzyl 3-methylbutanoate	103-38-8	not suitable	2	985	www.chemspider.com	0	0.07874	www.chemspider.com	0	277.1	www.chemspider.com	2	3.34	www.chemspider.com	113	www.chemspider.com	0	8.46	www.sigmaaldrich.com	2020-05-24	0											1
octan-1-ol	111-87-5	not suitable	0	826	www.pubchem.com	2	0.54	www.pubchem.com	0	195	www.pubchem.com	2	3	www.pubchem.com	86	Merck KGaA, Darmstadt, Germany	0	11	www.sigmaaldrich.com	2020-05-24	0				1	1						1
Bromobenzene	108-86-1	not suitable	2	1490	www.chemspider.com	0	0.1974	www.chemspider.com	0	156	www.sigmaaldrich.com	2	2.99	www.chemspider.com	51	Merck KGaA, Darmstadt, Germany	0	15.6	www.sigmaaldrich.com	2020-05-24	0									1
1-butoxybutane	142-96-1	not suitable	0	760	www.chemspider.com	0	0.1665	www.chemspider.com	0	140.8	www.pubchem.com	2	3.11	www.chemspider.com	25	Merck KGaA, Darmstadt, Germany	0	15.8	www.sigmaaldrich.com	2020-05-24	0									1		1	1
2-methylnaphthalene	91-57-6	not suitable	2	1006	www.pubchem.com	0	0.0246	www.pubchem.com	0	241.1	www.pubchem.com	1	3.86	www.pubchem.com	98	Merck KGaA, Darmstadt, Germany	0	17.61	www.sigmaaldrich.com	2020-05-24	0				1
hexan-1-ol	111-27-3	not suitable	0	815	www.pubchem.com	0	0.0059	www.pubchem.com	0	157	www.pubchem.com	2	2.03	www.pubchem.com	60	Merck KGaA, Darmstadt, Germany	0	18.7	www.sigmaaldrich.com	2020-05-24	0				1
2-ethylhexan-1-ol	104-76-7	not suitable	0	834	www.pubchem.com	2	0.88	www.pubchem.com	0	184.34	www.pubchem.com	2	2.73	www.pubchem.com	75	www.chemspider.com	0	19	www.sigmaaldrich.com	2020-05-24	0						1			1		1	1
Chlorobenzene	108-90-7	not suitable	2	1110	www.chemspider.com	1	0.4005	www.chemspider.com	0	132	www.sigmaaldrich.com	2	2.81	www.chemspider.com	27	Merck KGaA, Darmstadt, Germany	0	19	www.sigmaaldrich.com	2020-05-24	0						1			1
Benzyl benzoate	120-51-4	not suitable	2	1120	www.chemspider.com	0	0.01539	www.chemspider.com	0	324	www.sigmaaldrich.com	1	3.97	www.pubchem.com	158	Merck KGaA, Darmstadt, Germany	0	20.6	www.sigmaaldrich.com	2020-05-24	0				1
Octanal	124-13-0	not suitable	0	820	www.chemspider.com	1	0.3943	www.chemspider.com	0	171	www.sigmaaldrich.com	2	3.03	www.chemspider.com	52	Merck KGaA, Darmstadt, Germany	0	20.8	www.sigmaaldrich.com	2020-05-24	0									1		1
benzyl 2-methylprop-2-enoate	2495-37-6	not suitable	2	1040	www.chemspider.com	1	0.3968	www.chemspider.com	0	231	www.chemspider.com	2	2.82	www.chemspider.com	107	Merck KGaA, Darmstadt, Germany	0	21.24	www.sigmaaldrich.com	2020-05-24	0									1	1	1	1
Ethylbenzene	100-41-4	not suitable	0	867	www.pubchem.com	0	0.17	www.pubchem.com	0	136.2	www.pubchem.com	2	3.15	pubchem.ncbi.nlm.nih.gov	15	www.pubchem.com	0	21.4	www.sigmaaldrich.com	2020-05-24	0	1		1			1
Anisole	100-66-3	not suitable	2	990	www.chemspider.com	2	1.741	www.chemspider.com	0	154	www.sigmaaldrich.com	2	2.13	www.chemspider.com	43	Merck KGaA, Darmstadt, Germany	0	21.6	www.sigmaaldrich.com	2020-05-24	0							1
phenoxybenzene	101-84-8	not suitable	2	1070	www.chemspider.com	0	0.01558	www.chemspider.com	0	258	www.pubchem.com	0	4.21	www.chemspider.com	115	www.pubchem.com	0	22.4	www.sigmaaldrich.com	2020-05-24	0											1
1-bromohexane	111-25-1	not suitable	2	1180	www.chemspider.com	0	0.03688	www.chemspider.com	0	155.3	www.pubchem.com	1	3.81	www.chemspider.com	47	Merck KGaA, Darmstadt, Germany	0	23.1	www.sigmaaldrich.com	2020-05-24	0									1			1
2,6-diethylaniline	579-66-8	not suitable	2	960	www.pubchem.com	2	0.67	www.pubchem.com	0	235.5	www.pubchem.com	2	0.95	www.pubchem.com	115	Merck KGaA, Darmstadt, Germany	0	23.2	www.sigmaaldrich.com	2020-05-24	0				1
1-bromoheptane	629-04-9	not suitable	2	1140	www.chemspider.com	0	0.01051	www.chemspider.com	0	179	www.pubchem.com	0	4.34	www.chemspider.com	60	Merck KGaA, Darmstadt, Germany	0	23.26	www.sigmaaldrich.com	2020-05-24	0						1			1		1	1
1-bromodecane	112-29-8	not suitable	2	1070	www.chemspider.com	0	0.0005645	www.chemspider.com	0	240.6	www.pubchem.com	0	5.93	www.chemspider.com	94	Merck KGaA, Darmstadt, Germany	0	23.43	www.sigmaaldrich.com	2020-05-24	0									1		1
1H-indene	95-13-6	not suitable	2	996	www.chemspider.com	1	0.3324	www.chemspider.com	0	182	www.pubchem.com	2	2.91	www.chemspider.com	58	Merck KGaA, Darmstadt, Germany	0	26.2	www.sigmaaldrich.com	2020-05-24	0									1		1
bromomethylbenzene	100-39-0	not suitable	2	1440	www.chemspider.com	0	0.1951	www.chemspider.com	0	198	www.chemspider.com	2	2.92	www.chemspider.com	87	www.chemspider.com	0	30.2	www.sigmaaldrich.com	2020-05-24	0									1		1	1
1,2-xylene	95-47-6	not suitable	0	880	www.chemspider.com	0	0.2424	www.chemspider.com	0	144	www.pubchem.com	2	3.14	www.chemspider.com	30	Merck KGaA, Darmstadt, Germany	0	31.6	www.sigmaaldrich.com	2020-05-24	0					1	1			1
1-bromopentane	110-53-2	not suitable	2	1220	www.chemspider.com	0	0.09943	www.chemspider.com	0	130	www.sigmaaldrich.com	2	3.27	www.chemspider.com	32	Merck KGaA, Darmstadt, Germany	0	34.4	www.sigmaaldrich.com	2020-05-24	0									1
Cyclopentane	287-92-3	not suitable	0	750	www.chemspider.com	0	0.1077	www.chemspider.com	2	50	www.sigmaaldrich.com	2	2.82	www.chemspider.com	-20	Merck KGaA, Darmstadt, Germany	0	38.3	www.sigmaaldrich.com	2020-05-24	0
2,3-dihydro-1H-indene	496-11-7	not suitable	2	960	www.chemspider.com	0	0.196	www.chemspider.com	0	176	www.sigmaaldrich.com	2	3.34	www.chemspider.com	54	Merck KGaA, Darmstadt, Germany	0	46.4	www.sigmaaldrich.com	2020-05-24	0	1
1-chloro-4-methylbenzene	106-43-4	not suitable	2	1070	www.pubchem.com	0	0.106	www.pubchem.com	0	162	www.pubchem.com	2	3.33	www.pubchem.com	51	Merck KGaA, Darmstadt, Germany	0	51.47	www.sigmaaldrich.com	2020-05-24	0						1				1
cyclohexyl 2-methylprop-2-enoate	101-43-9	not suitable	2	970	www.chemspider.com	0	0.1331	www.chemspider.com	0	210	www.pubchem.com	2	3.4	www.chemspider.com	78	www.chemspider.com	0	54.4	www.sigmaaldrich.com	2020-05-24	0										1		1
Cyclopentyl methyl ether	5614-37-9	not suitable	0	860	www.chemspider.com	2	3.101	www.chemspider.com	0	105.3	www.chemspider.com	2	1.59	pubchem.ncbi.nlm.nih.gov	-1	Merck KGaA, Darmstadt, Germany	0	55.5	www.sigmaaldrich.com	2020-05-24	0				1					1		1
1-chloro-3-methylbenzene	108-41-8	not suitable	2	1072	www.pubchem.com	0	0.1499	www.chemspider.com	0	162.2	www.pubchem.com	2	3.27	www.chemspider.com	52	Merck KGaA, Darmstadt, Germany	0	55.74	www.sigmaaldrich.com	2020-05-24	0				1		1			1
1-iodoheptane	4282-40-0	not suitable	2	1380	www.chemspider.com	0	0.003094	www.chemspider.com	0	204	www.pubchem.com	0	4.7	www.pubchem.com	76	Merck KGaA, Darmstadt, Germany	0	65.41	www.sigmaaldrich.com	2020-05-24	0									1		1	1
1,3-xylene	108-38-3	not suitable	0	870	www.chemspider.com	0	0.207	www.chemspider.com	0	138	www.sigmaaldrich.com	2	3.14	www.chemspider.com	25	Merck KGaA, Darmstadt, Germany	0	85.5	www.sigmaaldrich.com	2020-05-24	0					1	1			1
Iodobenzene	591-50-4	not suitable	2	1820	www.chemspider.com	0	0.06998	www.chemspider.com	0	188	www.sigmaaldrich.com	2	3.25	www.chemspider.com	77	Merck KGaA, Darmstadt, Germany	0	90.3	www.sigmaaldrich.com	2020-05-24	0				1		1					1
1-methoxy-3-methylbenzene	100-84-5	not suitable	2	970	www.chemspider.com	0	0	www.chemspider.com	0	175.5	www.pubchem.com	2	2.59	www.chemspider.com	54	www.chemspider.com	0	91.5	www.sigmaaldrich.com	2020-05-24	0				1
phenylsulfanylbenzene	139-66-2	not suitable	2	1110	www.chemspider.com	0	0.00812	www.chemspider.com	0	296	www.sigmaaldrich.com	0	4.45	www.chemspider.com	110	Merck KGaA, Darmstadt, Germany	1	100.9	www.sigmaaldrich.com	2020-05-24	0				1					1
1-methoxy-2-methylbenzene	578-58-5	not suitable	2	990	www.chemspider.com	1	0.45	www.chemspider.com	0	171	www.pubchem.com	2	2.74	www.pubchem.com	52	Merck KGaA, Darmstadt, Germany	1	108	www.sigmaaldrich.com	2020-05-24	0				1
octan-3-ol	589-98-0	not suitable	0	820	www.chemspider.com	2	1.379	www.chemspider.com	0	169	www.chemspider.com	2	2.73	www.chemspider.com	68	Merck KGaA, Darmstadt, Germany	1	110	www.sigmaaldrich.com	2020-05-24	0									1		1
N-butylaniline	1126-78-9	not suitable	2	930	www.chemspider.com	0	0.06701	www.chemspider.com	0	236	www.sigmaaldrich.com	2	3.19	www.chemspider.com	106	Merck KGaA, Darmstadt, Germany	2	122.76	www.vwr.com	2020-05-24	0				1					1		1	1
hexylbenzene	1077-16-3	not suitable	0	860	www.chemspider.com	0	0.001291	www.chemspider.com	0	226.1	www.pubchem.com	0	5.52	www.pubchem.com	83	Merck KGaA, Darmstadt, Germany	2	152.22	www.sigmaaldrich.com	2020-05-24	0									1		1	1
prop-2-enylbenzene	300-57-2	not suitable	1	890	www.chemspider.com	0	0.1777	www.chemspider.com	0	156	www.sigmaaldrich.com	2	3.24	www.chemspider.com	40	Merck KGaA, Darmstadt, Germany	2	155	www.sigmaaldrich.com	2020-05-24	0	1								1		1	1
hept-1-ene	592-76-7	not suitable	0	697	www.pubchem.com	0	0.0182	www.pubchem.com	1	93.6	www.pubchem.com	1	3.99	www.pubchem.com	-8	Deutsche Gesetzliche Unfallversicherung e.V., Berlin, Germany	2	170	www.sigmaaldrich.com	2020-05-24	0	1								1		1	1
1-ethyl-4-methylbenzene	622-96-8	not suitable	0	860	www.chemspider.com	0	0.07959	www.chemspider.com	0	162	www.pubchem.com	1	3.63	www.pubchem.com	43	www.chemspider.com	2	175.44	www.sigmaaldrich.com	2020-05-24	0	1						1
2-methoxy-2-methylbutane	994-05-8	not suitable	0	766	www.pubchem.com	2	10.7	www.pubchem.com	1	86.3	www.pubchem.com	2	1.55	pubchem.ncbi.nlm.nih.gov	-7	Merck KGaA, Darmstadt, Germany	2	187	www.sigmaaldrich.com	2020-05-24	0				1			1
prop-2-enoxybenzene	1746-13-0	not suitable	2	980	www.chemspider.com	0	0	www.chemspider.com	0	192	www.sigmaaldrich.com	2	2.94	www.chemspider.com	63	Merck KGaA, Darmstadt, Germany	2	217.56	www.sigmaaldrich.com	2020-05-24	0				1	1	1
1,2,3-trimethylbenzene	526-73-8	not suitable	1	894	www.pubchem.com	0	0.0752	www.pubchem.com	0	176	www.pubchem.com	1	3.66	www.pubchem.com	51	Deutsche Gesetzliche Unfallversicherung e.V., Berlin, Germany	2	230	www.sigmaaldrich.com	2020-05-24	0									1		1	1
1-benzothiophene	95-15-8	not suitable	2	1150	www.chemspider.com	0	0.1916	www.chemspider.com	0	221	www.sigmaaldrich.com	0	4.38	www.chemspider.com	91	www.chemspider.com	2	241.5	www.sigmaaldrich.com	2020-05-24	0				1		1			1		1	1
decylbenzene	104-72-3	not suitable	0	855	www.pubchem.com	0	1.1e-08	www.pubchem.com	0	298	www.pubchem.com	0	7.37	www.pubchem.com	110	www.chemspider.com	2	351.41	www.sigmaaldrich.com	2020-05-24	0									1		1	1
N-methyl-N-phenylaniline	552-82-9	not suitable	2	1050	www.chemspider.com	0	0.02479	www.chemspider.com	0	293	www.sigmaaldrich.com	1	3.9	www.chemspider.com	110	Merck KGaA, Darmstadt, Germany	2	567	www.sigmaaldrich.com	2020-05-24	0									1		1	1
non-1-ene	124-11-8	not suitable	0	743	www.pubchem.com	0	0.00112	www.pubchem.com	0	146.9	www.pubchem.com	0	5.15	www.pubchem.com	24	Merck KGaA, Darmstadt, Germany	2	594.68	www.sigmaaldrich.com	2020-05-24	0	1								1		1	1
1,2,3,4-tetramethylbenzene	488-23-3	not suitable	1	900	www.chemspider.com	0	0.03394	www.chemspider.com	0	205	www.pubchem.com	0	4	www.pubchem.com	68	www.chemspider.com	2	738.09	www.sigmaaldrich.com	2020-05-24	0									1		1	1
propan-2-yl benzoate	939-48-0	not suitable	2	1000	www.chemspider.com	0	0.126	www.chemspider.com	0	216	www.pubchem.com	2	3.08	www.chemspider.com	99	www.chemspider.com	2	918.4	www.sigmaaldrich.com	2020-05-24	0										1
4-butylpyridine	5335-75-1	not suitable	1	900	www.chemspider.com	2	3.712	www.chemspider.com	0	209	www.pubchem.com	2	2.78	www.chemspider.com	74.6	www.chemspider.com	2	n.a.		2020-05-24	0				1					1		1	1
octan-4-ol	589-62-8	not suitable	1	900	www.chemspider.com	2	1.527	www.chemspider.com	0	174	www.sigmaaldrich.com	2	2.82	www.chemspider.com	65	Merck KGaA, Darmstadt, Germany	2	n.a.		2020-05-24	0											1
2,2-Dimethylpropane	463-82-1	not suitable	0	610	www.chemspider.com	0	0.08631	www.chemspider.com	2	9.5	www.chemspider.com	2	3.05	www.chemspider.com	-7.15	www.chemspider.com	2	n.a.		2020-05-24	0
Propoxybenzene	622-85-5	not suitable	1	900	www.chemspider.com	0	0.1671	www.chemspider.com	0	189.9	www.pubchem.com	2	3.2	www.chemspider.com	57	www.chemspider.com	2	n.a.		2020-05-24	0									1		1
4-pentylpyridine	2961-50-4	not suitable	1	900	www.chemspider.com	2	0.957	www.chemspider.com	0	226.8	www.chemspider.com	1	3.75	www.pubchem.com	90.8	www.chemspider.com	2	n.a.		2020-05-24	0									1		1
4-hexylpyridine	27876-24-0	not suitable	1	900	www.chemspider.com	0	0.2543	www.chemspider.com	0	237	www.chemspider.com	1	3.84	www.chemspider.com	113.2	www.chemspider.com	2	n.a.		2020-05-24	0				1					1		1	1
1,2,3,5-tetramethylbenzene	527-53-7	not suitable	1	891	www.pubchem.com	0	0.02788	www.chemspider.com	0	198	www.pubchem.com	0	4.1	www.pubchem.com	63	Deutsche Gesetzliche Unfallversicherung e.V., Berlin, Germany	2	n.a.		2020-05-24	0									1		1
1-methyl-2-propan-2-ylbenzene	527-84-4	not suitable	0	877	www.pubchem.com	0	0.0233	www.pubchem.com	0	178	www.pubchem.com	0	4.26	www.pubchem.com	50	Merck KGaA, Darmstadt, Germany	2	n.a.		2020-05-24	0				1
1-methyl-3-propan-2-ylbenzene	535-77-3	not suitable	0	861	www.pubchem.com	0	0.0425	www.pubchem.com	0	175	www.pubchem.com	0	4.5	www.pubchem.com	47	Merck KGaA, Darmstadt, Germany	2	n.a.		2020-05-24	0											1
2-methylheptane	592-27-8	not suitable	0	698	www.pubchem.com	0	0	www.pubchem.com	0	117.6	www.pubchem.com	0	4.82	www.chemspider.com	4	Merck KGaA, Darmstadt, Germany	2	n.a.		2020-05-24	0	1						1		1
(Z)-stilbene	645-49-8	not suitable	2	1040	www.chemspider.com	0	0.004285	www.chemspider.com	0	330	www.chemspider.com	0	4.83	www.chemspider.com	110	Merck KGaA, Darmstadt, Germany	2	n.a.		2020-05-24	0									1		1
2,6-di(butan-2-yl)phenol	5510-99-6	not suitable	1	900	www.chemspider.com	0	0.02918	www.chemspider.com	0	257.5	www.pubchem.com	0	5.22	www.chemspider.com	127	www.chemspider.com	2	n.a.		2020-05-24	0				1					1
(5Z,8Z,11Z,14Z)-icosa-5,8,11,14-tetraenoic acid	506-32-1	not suitable	1	900	www.chemspider.com	0	3.141e-05	www.chemspider.com	0	407.5	www.chemspider.com	0	6.98	www.pubchem.com	298	www.chemspider.com	2	n.a.		2020-05-24	0				1	1	1			1		1	1
dioctyl hexanedioate	123-79-5	not suitable	2	980	www.chemspider.com	0	4.08e-07	www.chemspider.com	0	417	www.pubchem.com	0	8.47	www.chemspider.com	196	www.pubchem.com	2	n.a.		2020-05-24	0									1		1
1-chloro-2-phenylbenzene	2051-60-7	not suitable	2	1150	www.chemspider.com	0	0.006755	www.chemspider.com	0	274	www.pubchem.com	0	453	www.pubchem.com	107.3	Merck KGaA, Darmstadt, Germany	2	n.a.		2020-05-24	0			1
hex-1-ene	592-41-6	not suitable	0	673	www.pubchem.com	0	0.05	www.pubchem.com	2	63.4	www.pubchem.com	2	3.39	www.pubchem.com	-25	Merck KGaA, Darmstadt, Germany	0	18.1	www.sigmaaldrich.com	2020-05-24	1	1
ethoxyethane	60-29-7	not suitable	0	714	www.pubchem.com	2	60.4	www.pubchem.com	2	34.6	www.pubchem.com	2	0.89	pubchem.ncbi.nlm.nih.gov	-40	Merck KGaA, Darmstadt, Germany	0	44	www.sigmaaldrich.com	2020-05-24	1				1			1
Cyclohexane	110-82-7	not suitable	0	779	www.pubchem.com	0	0.055	www.pubchem.com	1	80.7	www.pubchem.com	2	3.44	pubchem.ncbi.nlm.nih.gov	-18	Merck KGaA, Darmstadt, Germany	0	46.4	www.sigmaaldrich.com	2020-05-24	1	1						1		1
Methylcyclopentane	96-37-7	not suitable	0	750	www.chemspider.com	0	0.04937	www.chemspider.com	2	72	www.sigmaaldrich.com	2	3.31	www.chemspider.com	-29	Merck KGaA, Darmstadt, Germany	0	46.6	www.sigmaaldrich.com	2020-05-24	1	1						1		1
2-methoxy-2-methylpropane	1634-04-4	not suitable	0	741	www.pubchem.com	2	42	www.pubchem.com	2	55.1	www.pubchem.com	2	0.94	pubchem.ncbi.nlm.nih.gov	-33	Merck KGaA, Darmstadt, Germany	0	52.7	www.sigmaaldrich.com	2020-05-24	1									1
Ethyl acetate	141-78-6	not suitable	1	902	www.pubchem.com	2	80	www.pubchem.com	2	77.2	www.pubchem.com	2	0.73	pubchem.ncbi.nlm.nih.gov	26.6	Merck KGaA, Darmstadt, Germany	0	53.1	www.sigmaaldrich.com	2020-05-24	1							1				1
Pentane	109-66-0	not suitable	0	626	www.pubchem.com	0	0.038	www.pubchem.com	2	36	www.pubchem.com	2	3.39	pubchem.ncbi.nlm.nih.gov	-49	Merck KGaA, Darmstadt, Germany	0	53.6	www.sigmaaldrich.com	2020-05-24	1	1						1
3-methylpentane	96-14-0	not suitable	0	664	www.pubchem.com	0	0.0179	www.pubchem.com	2	63.3	www.pubchem.com	1	3.6	www.pubchem.com	-7	Merck KGaA, Darmstadt, Germany	0	56.4	www.sigmaaldrich.com	2020-05-24	1	1						1		1
hex-1-yne	693-02-7	not suitable	0	720	www.chemspider.com	0	0.1754	www.chemspider.com	2	71	www.sigmaaldrich.com	2	2.59	www.chemspider.com	-20	Merck KGaA, Darmstadt, Germany	1	102	www.sigmaaldrich.com	2020-05-24	1	1								1		1	1
3-methylbutan-1-ol	123-51-3	not suitable	0	810	www.pubchem.com	2	26.7	www.pubchem.com	0	132.2	www.pubchem.com	2	1.29	pubchem.ncbi.nlm.nih.gov	43	Merck KGaA, Darmstadt, Germany	0	8.4	www.sigmaaldrich.com	2020-05-24	1						1			1			1			1
butan-1-ol	71-36-3	not suitable	0	810	www.pubchem.com	2	63.2	www.pubchem.com	0	117.7	www.pubchem.com	2	0.88	www.pubchem.com	35	Merck KGaA, Darmstadt, Germany	0	17.24	www.sigmaaldrich.com	2020-05-24	1				1			1		1			1			1
octan-2-ol	123-96-6	not suitable	0	820	www.chemspider.com	2	0.9909	www.chemspider.com	0	177	www.sigmaaldrich.com	2	2.82	www.chemspider.com	71	Merck KGaA, Darmstadt, Germany	0	22.4	www.sigmaaldrich.com	2020-05-24	1															1
2-ethylhexane-1,3-diol	94-96-2	not suitable	2	933	www.pubchem.com	2	3.389	www.chemspider.com	0	244.2	www.pubchem.com	2	1.25	www.chemspider.com	120	Merck KGaA, Darmstadt, Germany	0	23.6	www.sigmaaldrich.com	2020-05-24	1															1
2-methylpropan-1-ol	78-83-1	not suitable	0	802	www.pubchem.com	2	85	www.pubchem.com	0	107.2	www.pubchem.com	2	0.76	www.pubchem.com	28	Merck KGaA, Darmstadt, Germany	0	75.4	www.sigmaaldrich.com	2020-05-24	1							1		1			1			1
2-propylphenol	644-35-9	not suitable	2	990	www.chemspider.com	2	1.039	www.chemspider.com	0	220	www.pubchem.com	2	2.93	www.pubchem.com	93	Merck KGaA, Darmstadt, Germany	2	216.61	www.sigmaaldrich.com	2020-05-24	1				1	1	1			1		1	1			1
[(E)-prop-1-enyl]benzene	873-66-5	not suitable	1	902	www.pubchem.com	0	0.14	www.pubchem.com	0	175.5	www.pubchem.com	2	3.35	www.pubchem.com	52	Merck KGaA, Darmstadt, Germany	2	n.a.		2020-05-24	1	1								1			1		1	1
2-methyloxolane	96-47-9	not suitable	0	860	www.chemspider.com	2	8.861	www.chemspider.com	2	78	www.pubchem.com	2	0.82	www.chemspider.com	-10	Merck KGaA, Darmstadt, Germany	0	67.3	www.sigmaaldrich.com	2020-05-24	2				1					1						1
phenyl 3-methylbutanoate	15806-38-9	not suitable	2	1000	www.chemspider.com	0	0.1081	www.chemspider.com	0	243.3	www.chemspider.com	2	2.96	www.chemspider.com	85.9	www.chemspider.com	2	n.a.		2020-05-24	2
methyl 3-methyl-2-phenylbutanoate	72615-27-1	not suitable	2	1000	www.chemspider.com	0	0.06861	www.chemspider.com	0	245.7	www.chemspider.com	2	3.19	www.chemspider.com	93.1	www.chemspider.com	2	n.a.		2020-05-24	2
4-methyl-1-phenylpentan-2-amine	67309-38-0	not suitable	1	900	www.chemspider.com	2	0.8961	www.chemspider.com	0	260	www.chemspider.com	2	3.22	www.chemspider.com	99.9	www.chemspider.com	2	n.a.		2020-05-24	2
1-(3,4,5-trimethylphenyl)propan-2-amine	32156-17-5	not suitable	1	900	www.chemspider.com	2	0.7256	www.chemspider.com	0	278.3	www.chemspider.com	2	3.26	www.chemspider.com	115.7	www.chemspider.com	2	n.a.		2020-05-24	2
methyl 2,2-dimethyl-3-(2-methylprop-1-enyl)cyclopropane-1-carboxylate	5460-63-9	not suitable	2	1000	www.chemspider.com	0	0.03302	www.chemspider.com	0	205.2	www.chemspider.com	1	3.73	www.chemspider.com	56.6	www.chemspider.com	2	n.a.		2020-05-24	2
1,7-dimethylnaphthalene	575-37-1	not suitable	2	1010	www.chemspider.com	0	0.0115	www.chemspider.com	0	263	www.pubchem.com	0	4.37	www.chemspider.com	91	www.chemspider.com	2	n.a.		2020-05-24	2
bis(7-methyloctyl) cyclohexane-1,2-dicarboxylate	318292-43-2	not suitable	2	950	www.chemspider.com	0	8.83e-09	www.chemspider.com	0	394	www.pubchem.com	0	9.69	www.chemspider.com	224	www.pubchem.com	2	n.a.		2020-05-24	2
1-methyl-4-propan-2-ylbenzene	99-87-6	not suitable	0	857	www.pubchem.com	0	0.0234	www.pubchem.com	0	177.1	www.pubchem.com	0	4.1	www.pubchem.com	47	Deutsche Gesetzliche Unfallversicherung e.V., Berlin, Germany	0	3.95934	www.sigmaaldrich.com	2020-05-24	2	1																	1
1-methoxy-4-methylbenzene	104-93-8	not suitable	2	970	www.chemspider.com	2	0.5271	www.chemspider.com	0	174	www.chemspider.com	2	2.59	www.chemspider.com	58	www.chemspider.com	0	18.5	www.sigmaaldrich.com	2020-05-24	2				1					1									1
Tributyl phosphate	126-73-8	not suitable	2	980	www.chemspider.com	0	0.007355	www.chemspider.com	0	289	www.sigmaaldrich.com	0	4.26	www.chemspider.com	146	Merck KGaA, Darmstadt, Germany	0	20.6	www.sigmaaldrich.com	2020-05-24	2				1					1								1
1-chloro-2-methylbenzene	95-49-8	not suitable	2	1083	www.pubchem.com	1	0.374	www.pubchem.com	0	159	www.pubchem.com	2	3.42	www.pubchem.com	42	Merck KGaA, Darmstadt, Germany	0	23.61	www.sigmaaldrich.com	2020-05-24	2						1												1
Styrene	100-42-5	not suitable	1	910	www.chemspider.com	1	0.3437	www.chemspider.com	0	145	www.pubchem.com	2	2.7	www.chemspider.com	31	www.pubchem.com	0	24.8	www.sigmaaldrich.com	2020-05-24	2	1					1			1		1	1						1		1
Toluene	108-88-3	not suitable	0	867	www.pubchem.com	2	0.526	www.pubchem.com	0	110.6	www.pubchem.com	2	2.73	pubchem.ncbi.nlm.nih.gov	4	Merck KGaA, Darmstadt, Germany	0	44	www.sigmaaldrich.com	2020-05-24	2	1		1				1		1									1
4-butylaniline	104-13-2	not suitable	2	940	www.chemspider.com	0	0	www.chemspider.com	0	261	www.pubchem.com	2	2.99	www.chemspider.com	101	www.chemspider.com	0	58.562	www.sigmaaldrich.com	2020-05-24	2									1		1	1									1	1	1
hexan-2-one	591-78-6	not suitable	0	812	www.pubchem.com	2	17.2	www.pubchem.com	0	127.2	www.pubchem.com	2	1.38	www.pubchem.com	23	Merck KGaA, Darmstadt, Germany	2	123.56	www.sigmaaldrich.com	2020-05-24	2							1											1		1
hexa-1,5-diene-3,4-diol	1069-23-4	not suitable	0	690	www.chemspider.com	0	0.1332	www.chemspider.com	0	230	www.chemspider.com	2	2.8	www.chemspider.com	93	Merck KGaA, Darmstadt, Germany	2	n.a.		2020-05-24	2																					1	1	1
cyclododeca-1,5,9-triene	706-31-0	not suitable	0	880	www.chemspider.com	0	0.00047	www.pubchem.com	0	231	www.pubchem.com	0	5.5	www.pubchem.com	88	www.pubchem.com	2	n.a.		2020-05-24	2																							1
1,2,3,4,4a,5,6,7,8,8a-decahydronaphthalene	91-17-8	not suitable	1	890	www.pubchem.com	0	0.000889	www.pubchem.com	0	195	www.pubchem.com	0	4.93	www.chemspider.com	56	Deutsche Gesetzliche Unfallversicherung e.V., Berlin, Germany	0	10.12	www.sigmaaldrich.com	2020-05-24	2	1																						1	1
octan-1-amine	111-86-4	not suitable	0	780	www.chemspider.com	2	3.147	www.chemspider.com	0	178	www.sigmaaldrich.com	2	3.06	www.chemspider.com	58	Merck KGaA, Darmstadt, Germany	0	15.2	www.sigmaaldrich.com	2020-05-24	2						1						1									1	1		1
Hexane	110-54-3	not suitable	0	660	www.chemspider.com	0	0.01724	www.chemspider.com	2	68.73	www.pubchem.com	1	3.94	www.chemspider.com	-26	Merck KGaA, Darmstadt, Germany	0	24.6	www.sigmaaldrich.com	2020-05-24	2	1		1				1		1									1
Chloroform	67-66-3	not suitable	2	1490	www.chemspider.com	2	2.096	www.chemspider.com	2	61.1	www.pubchem.com	2	1.75	www.chemspider.com	n.a.	www.pubchem.com	0	34	www.sigmaaldrich.com	2020-05-24	2			1	1		1	1		1		1						1	1
Octanoic acid	124-07-2	not suitable	1	910	www.chemspider.com	1	0.4959	www.chemspider.com	0	237	www.sigmaaldrich.com	2	2.9	www.chemspider.com	110	Merck KGaA, Darmstadt, Germany	0	50.3	www.sigmaaldrich.com	2020-05-24	2																								1
2,3-dimethylbutane	79-29-8	not suitable	0	662	www.pubchem.com	0	0.0225	www.pubchem.com	2	57.9	www.pubchem.com	2	3.42	www.pubchem.com	-29	Merck KGaA, Darmstadt, Germany	0	66.4	www.sigmaaldrich.com	2020-05-24	2	1		1				1		1									1
tetrachloromethane	56-23-5	not suitable	2	1590	www.chemspider.com	0	0.2795	www.chemspider.com	2	76	www.sigmaaldrich.com	2	2.86	www.chemspider.com	-0.3	www.chemspider.com	2	193	www.sigmaaldrich.com	2020-05-24	2																	1			1	1	1	1
decan-1-amine	2016-57-1	not suitable	0	730	www.pubchem.com	1	0.4229	www.chemspider.com	0	220.5	www.pubchem.com	2	1.92	www.pubchem.com	89	Merck KGaA, Darmstadt, Germany	2	252.58	www.sigmaaldrich.com	2020-05-24	2																					1	1		1
nonan-1-amine	112-20-9	not suitable	0	780	www.chemspider.com	2	1.28	www.chemspider.com	0	202	www.sigmaaldrich.com	1	3.59	www.chemspider.com	63	Merck KGaA, Darmstadt, Germany	2	393.6	www.sigmaaldrich.com	2020-05-24	2				1	1	1																		1
2,2-dimethylbutane	75-83-2	not suitable	0	644	www.pubchem.com	0	0.0212	www.pubchem.com	2	49.7	www.pubchem.com	1	3.82	www.pubchem.com	-29	Merck KGaA, Darmstadt, Germany	2	881	www.sigmaaldrich.com	2020-05-24	2	1		1				1		1									1
4-Propylphenol	645-56-7	not suitable	2	980	www.chemspider.com	2	0.6107	www.chemspider.com	0	232	www.sigmaaldrich.com	2	3.01	www.chemspider.com	106	Merck KGaA, Darmstadt, Germany	2	n.a.		2020-05-24	2																								1
4-butylphenol	1638-22-8	not suitable	2	980	www.chemspider.com	0	0.2198	www.chemspider.com	0	248	www.pubchem.com	1	3.54	www.chemspider.com	22	www.chemspider.com	2	n.a.		2020-05-24	2																								1
dibutyl benzene-1,2-dicarboxylate	84-74-2	not suitable	2	1050	www.chemspider.com	0	0.00235	www.chemspider.com	0	340	www.sigmaaldrich.com	0	4.82	www.chemspider.com	171	Merck KGaA, Darmstadt, Germany	0	26.1	www.sigmaaldrich.com	2020-05-24	2																											1
1,1,2-trichloroethane	79-00-5	not suitable	2	1442	www.pubchem.com	0	0.0045	www.pubchem.com	0	114	www.pubchem.com	2	1.89	www.pubchem.com	114	www.chemspider.com	0	26.76	www.sigmaaldrich.com	2020-05-24	2				1													1						1
bis(2-ethylhexyl) benzene-1,2-dicarboxylate	117-81-7	not suitable	2	990	www.pubchem.com	0	0.00027	www.pubchem.com	0	384	www.pubchem.com	0	7.6	www.pubchem.com	207	Merck KGaA, Darmstadt, Germany	2	n.a.		2020-05-24	2																											1
Benzene	71-43-2	not suitable	0	879	www.pubchem.com	2	1.79	www.pubchem.com	1	80	www.pubchem.com	2	2.13	pubchem.ncbi.nlm.nih.gov	-11	Merck KGaA, Darmstadt, Germany	0	48.7	www.sigmaaldrich.com	2020-05-24	2	1								1		1									1					1	1
[truncated: 6 more columns]

## Sheet: evaluation
	Over-all	Density	Solubility	Boiling point	log KOW-value	Price	Health Score		Percentage
unrestricted	18	79	136	160	67	113	133		0.0983607
restricted	14	29	11	6	28	5	16		0.0765027
not suitable	151	75	35	17	88	29	34		0.825137
No value	0	0	1	0	0	36	0
Sum	183	183	183	183	183	183	183
